# Supplementary material for: Tissue specificity of senescent cell accumulation during physiologic and accelerated aging of mice
Source: PubMed Central journal article supplement (PMC7059165; doi:10.1111/acel.13094), 2020-01-25

A.

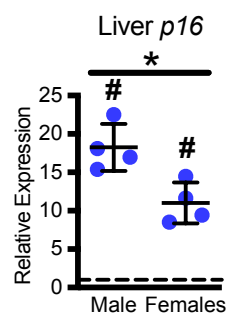

B.

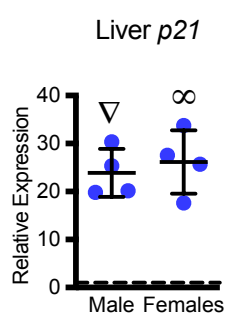

● &gt; 140 wk WT

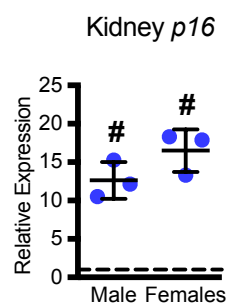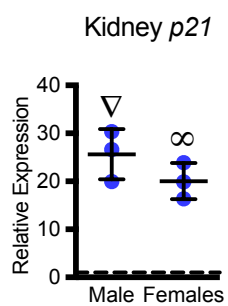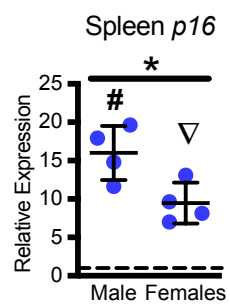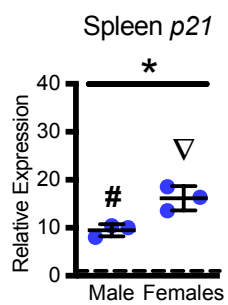

Supplement: ACEL-19-e13094-s001.pdf [file ACEL-19-e13094-s001.pdf]
